# Supplementary material
Source: PubMed Central journal article supplement (PMC2839429)
Supplement: mt201036x2.pdf [file mt201036x2.pdf]

Figure S2

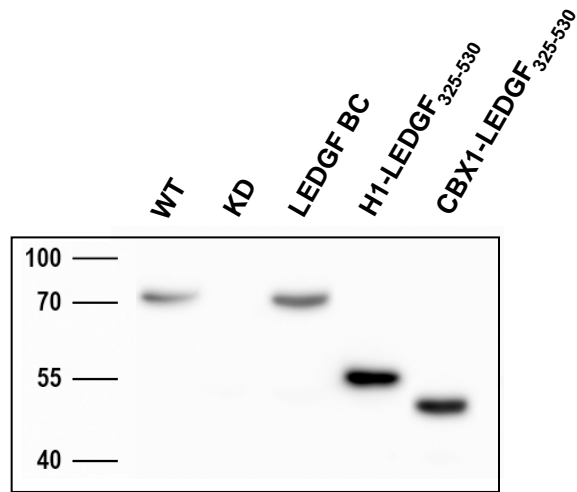

**Figure S2. Western profile of LEDGF hybrids.** Anti-LEDGF<sub>325-530</sub> blot of a total cell extract of KD cells stably overexpressing LEDGF-hybrids.
