# Supplementary material
Source: PubMed Central journal article supplement (PMC2839429)
Supplement: mt201036x3.pdf [file mt201036x3.pdf]

Figure S3

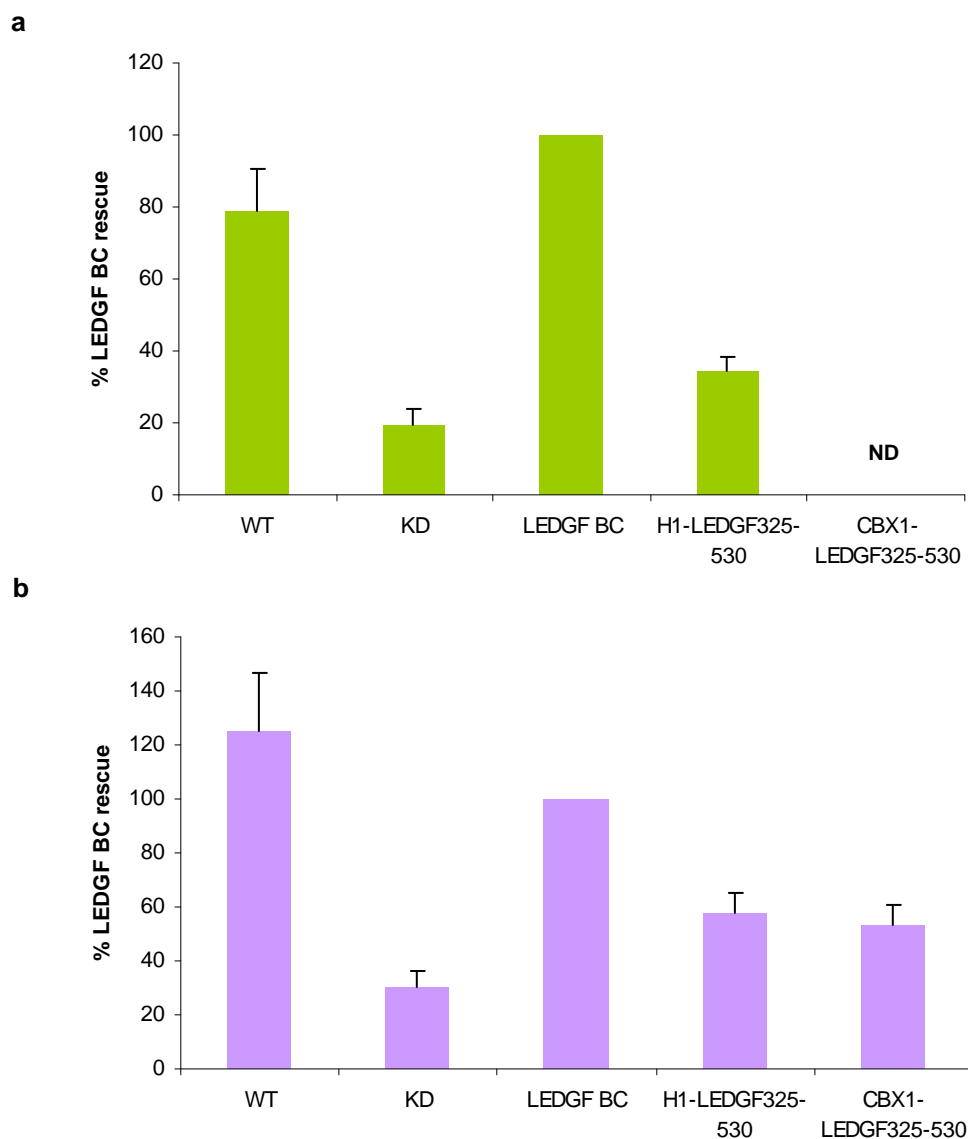

**Figure S3. Rescue of HIV-based LV transduction by LEDGF hybrids in B5 and D11 monoclonal LEDGF/p75 KD lines.** The LEDGF<sub>325-530</sub> fusion proteins were tested for their ability to rescue HIV-based lentiviral vector transduction (LV CMV eGFP-T2A-fLuc). WT and LEDGF BC cells are used as controls. **(a)**, transduction results of complemented B5 cells (RLU/ $\mu$ g protein), data compile at least six individual experiments and are expressed as percentages (mean  $\pm$  stdev) relative to cells complemented with LEDGF BC; **(b)**, Same as in panel **a** except that complemented D11 cells were tested. ND, not determined.
