# Supplementary material
Source: PubMed Central journal article supplement (PMC2839429)
Supplement: mt201036x4.pdf [file mt201036x4.pdf]

**Figure S4**

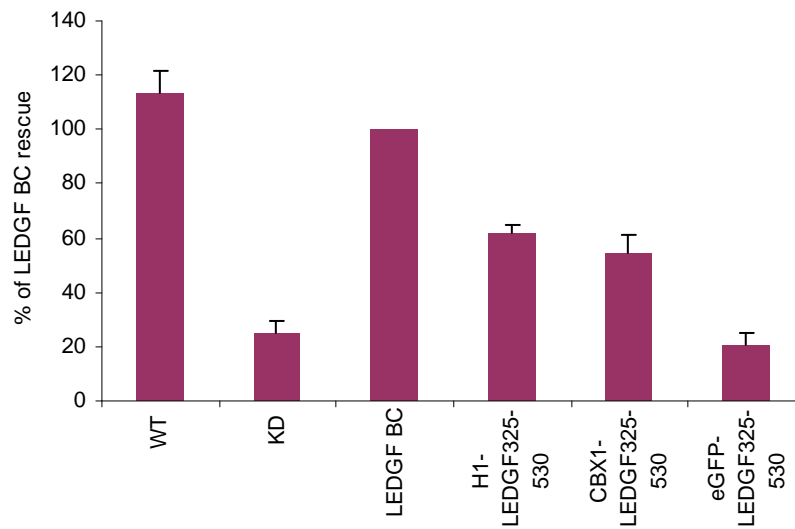

**Figure S4. Rescue of single-round HIV-based lentiviral vector transduction by LEDGF hybrids.** Same as in Fig. 3a except here eGFP fluorescence was evaluated by FACS analysis. Data are expressed as percentages relative to LEDGF BC complemented cells (mean  $\pm$  stdev).
