# Supplementary material
Source: PubMed Central journal article supplement (PMC2839429)
Supplement: mt201036x5.pdf [file mt201036x5.pdf]

Figure S5

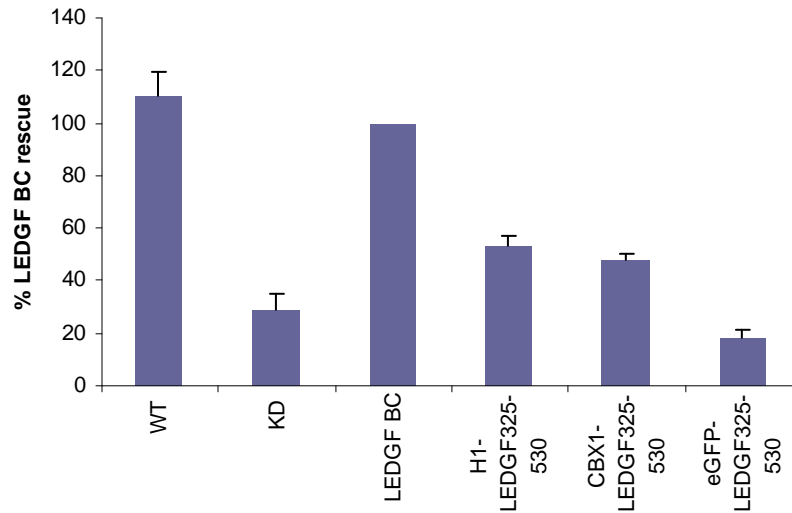

**Figure S5. Rescue of HIV<sub>NL4.3</sub> fLuc infection by LEDGF hybrids.** LEDGF<sub>325-530</sub> fusions restore HIV<sub>NL4.3</sub> fLuc infection in KD cells. Transduction results (RLU/ $\mu$ g protein) compile at least six individual luciferase assays. Data are expressed as percentages (mean  $\pm$  stdev) relative to cells complemented with LEDGF BC.
