# Supplementary material
Source: PubMed Central journal article supplement (PMC2839429)
Supplement: mt201036x10.pdf [file mt201036x10.pdf]

**Supporting Table S1.** Oligos used for cloning in this study.

| <b><u>Primer names</u></b> | <b><u>Primer Sequence (5'-3')</u></b>                                                                                                              |
|----------------------------|----------------------------------------------------------------------------------------------------------------------------------------------------|
| Zeocin_as BglII            | AAA AAA AGA TCT CAG TCC TGC TCC TCG GCC ACG                                                                                                        |
| sh mir_s Agel              | AAA AAA ACC GGT TTT GAC CTC CAT AGA AGA CAC                                                                                                        |
| Zeo_s BamHI                | AAA GGA TCC ATG GCC AAG TTG ACC AGT GC                                                                                                             |
| Zeo_as MluI                | AAA AAA CGC GTT CAG TCC TGC TCC TCG GCC ACG AAG TGC                                                                                                |
| UNI_miRNAi_s               | AAA AAA GAT CTC GAG ATC CAA GAA GGT ATA TTG CTG TTG ACA GTG AGC G                                                                                  |
| UNI_miRNAi_as              | AAA AAA GGA TCC AAG TCG ACA TCG TAG CCC TTG AAG TCC GAG GCA GTA<br>GGC A                                                                           |
| LEDGF template             | TGC TGT TGA CAG TGA GCG <b>CTG ACA GCA TGA GGA AGC GAA TTA</b> GTG AAG<br>CCA CAG ATG TAA <b>TTG GCT TCC TCA TGC TGT CTT</b> TGC CTA CTG CCT CGG A |
| LEDGF_KZ                   | GGC GGG ATC CAG ACA CCA TGA CTC GCG ATT TCA AAC C                                                                                                  |
| LEDGF_as Sall              | AAA AAA GTC GAC TAG TTA TCT AGT GTA GAA TCC TTC                                                                                                    |
| Flag_s BglII               | AAA AAA AGA TCT ATG GAC TAC AAA GAC CAT GAC GGT G                                                                                                  |
| AR DBD.CTE15_as XhoI       | AAA AAA CTC GAG TAG TTT CAG ATT ACC AAG TTT CTT CAG C                                                                                              |
| Flag_s Agel                | AAA AAA ACC GGT ATG GAC TAC AAA GAC CAT GAC GGT G                                                                                                  |
| StuI 325_as primer         | GTA ATC ATC TCT GTG TGT TTC TGA GC                                                                                                                 |
| HsH1F0_s XmaI              | AAA AAA CCC GGG ATG ACC GAG AAT TCC ACG TCC GCC                                                                                                    |
| HsH1F0_as XhoI             | AAA AAA CTC GAG CTT CTT CTT GCC GGC CCT CTT GG                                                                                                     |
| HsCBX1_s Agel              | AAA AAA ACC GGT ATG GGG AAA AAG CAA AAC AAG AAG AAA G                                                                                              |
| HsCBX1_as XhoI             | AAA AAA CTC GAG GTT CTT GTC GTC TTT TTT GTC ATC ATC C                                                                                              |
